# Supplementary material
Source: Springer Nature journal article supplement (https://www.springermedizin.de/resource/supplementary/12957_2011_948_MOESM1_ESM.pdf/9562026)

### colon

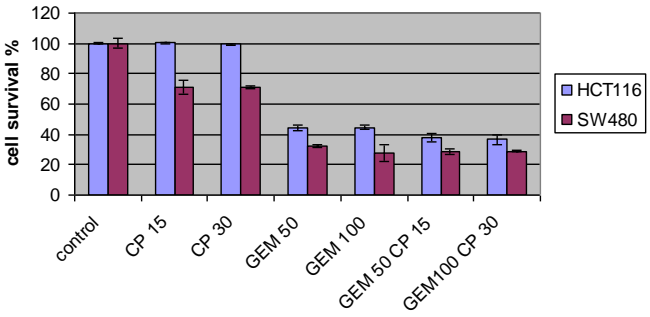

### breast

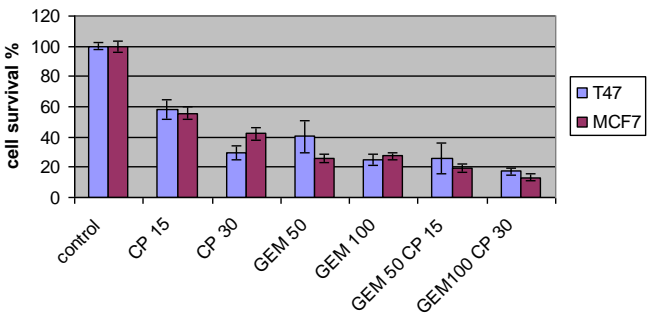

### ovary

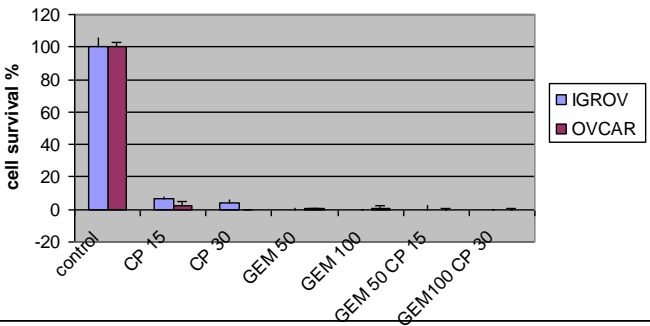

### lung

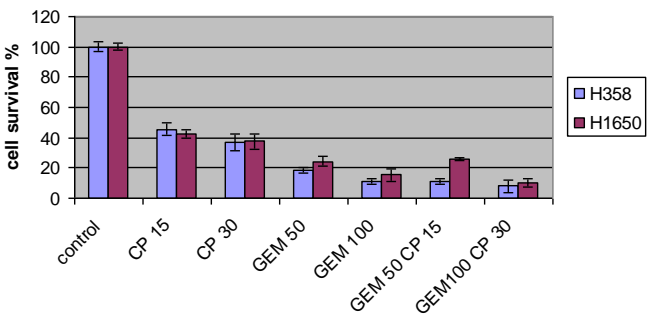

Supplement: MOESM1 [file 9562026]
